# Supplementary material for: The Economic Costs of Type 2 Diabetes: A Global Systematic Review
Source: Springer Nature journal article supplement (doi:10.1007/s40273-015-0268-9), 2015-03-18
Supplement: MOESM1 [file 24129734]

The economic costs of type 2 diabetes: a global systematic review

Pharmacoeconomics

Till Seuring<sup>1</sup>, Olga Archangelidi<sup>2</sup>, Marc Suhrcke<sup>1,3,4</sup>

<sup>1</sup>Health Economics Group, Norwich Medical School, University of East Anglia, Norwich, United Kingdom, Email: T.Seuring@uea.ac.uk

<sup>2</sup>Clinical Epidemiology Group, Department of Epidemiology and Public Health, University College London, London, United Kingdom

<sup>3</sup>Centre for Health Economics, University of York, York, United Kingdom

<sup>4</sup>UKCRC Centre for Diet and Activity Research (CEDAR), Cambridge, United Kingdom

**Table EMS\_1** Information on cost of illness studies (2001 - 2014)

| Ref. | Horizon   | Country                | Sample size          | Population                                 | Perspective     | Approach | LCU  | Aggregate costs (mill. \$) |                           |                    | Per capita costs                               |                                                          |                    |                    |
|------|-----------|------------------------|----------------------|--------------------------------------------|-----------------|----------|------|----------------------------|---------------------------|--------------------|------------------------------------------------|----------------------------------------------------------|--------------------|--------------------|
|      |           |                        |                      |                                            |                 |          |      | Total                      | Direct                    | Indirect           | Direct (LCU)                                   | Direct (\$)                                              | Indirect (LCU)     | Indirect (\$)      |
| [10] | 2002-2003 | 35 LMIC                | 121051               | General pop.                               | Patient         | RB/M     | \$   |                            |                           |                    | 3 at 50th percentile to 157 at 95th percentile | 3.40 at 50th percentile to 178 at 95th percentile        |                    |                    |
| [11] | NA        | Various Arab countries | NA                   | General pop.                               | Healthc. system | SAM      | US\$ |                            |                           |                    | US\$529 <sup>l</sup>                           |                                                          |                    |                    |
| [14] | 2000      | ARG                    | 1250300              | General pop.                               | Societal        | SAM      | ARS  | 16547                      | 1130                      | 15416 <sup>b</sup> | 597 <sup>a</sup>                               | 904 <sup>a</sup>                                         | 8145 <sup>a</sup>  | 12330 <sup>a</sup> |
| [42] | 2000-2051 | AUS                    | 1294                 | General pop.                               | Healthc. system | SDS      | AUD  |                            | 1514 (2000), 2282 (2051)  |                    | 3496 <sup>a</sup> (2000)                       | 3379 <sup>a</sup> (2000)                                 |                    |                    |
| [14] | 2000      | BHS                    | 12800                | General pop.                               | Societal        | SAM      | BSD  | 43                         | 25.2                      | 16                 | 1605                                           | 2507                                                     | 1009               | 1575               |
| [41] | 2001      | BHS                    | 10435                | General pop.                               | Societal        | SDS      | BSD  | 233                        | 17                        | 216 <sup>b</sup>   | 836 <sup>a</sup>                               | 1310 <sup>a</sup>                                        | 10789 <sup>a</sup> | 16914 <sup>a</sup> |
| [41] | 2001      | BRB                    | 28438                | General pop.                               | Societal        | SDS      | BBD  | 75                         | 69.2                      | 5                  | 2455                                           | 2433                                                     | 204                | 202                |
| [14] | 2000      | BRB                    | 23300                | General pop.                               | Societal        | SAM      | BBD  | 307                        | 26                        | 281 <sup>b</sup>   | 1099 <sup>a</sup>                              | 1117 <sup>a</sup>                                        | 11880 <sup>a</sup> | 12076 <sup>a</sup> |
| [15] | 1999      | BEL                    | 735 patients         | General pop.                               | Healthc. system | SAM      | EUR  |                            | 1561                      |                    | 3295                                           | 4704                                                     |                    |                    |
| [15] | 1999      | EUR                    | 7000 (overall)       | General pop.                               | Healthc. system | SAM      | EUR  |                            |                           |                    | 2834                                           | Not possible because no country specific estimate        |                    |                    |
| [14] | 2000      | BOL                    | 153900               | General pop.                               | Societal        | SAM      | BOB  | 901                        | 338                       | 563 <sup>b</sup>   | 3435 <sup>a</sup>                              | 2199 <sup>a</sup>                                        | 5717 <sup>a</sup>  | 3659 <sup>a</sup>  |
| [14] | 2000      | BRA                    | 4532600              | General pop.                               | Societal        | SAM      | BRL  | 54892                      | 9598                      | 45294 <sup>b</sup> | 1595 <sup>a</sup>                              | 2118 <sup>a</sup>                                        | 1595 <sup>a</sup>  | 9993 <sup>a</sup>  |
| [17] | 2008-2035 | CAN                    | 147498 with diabetes | Four Alberta Health and Wellness databases | Healthc. system | SAM      | CAD  |                            | 5934 (2007); 20032 (2035) |                    | 4563 <sup>a</sup>                              | 4023 <sup>a</sup>                                        |                    |                    |
| [18] | 1993-2001 | CAN                    | 57774                | Saskatchewan Canadians                     | Healthc. system | SAM      | CAD  |                            |                           |                    | large urban:3563 (1993), 3454 (2001), small    | large urban: 2665 (1993), 3591 (2001), small urban: 3453 |                    |                    |

| Ref. | Horizon   | Country | Sample size                                                   | Population                                                                | Perspective     | Approach | LCU | Aggregate costs (mill. \$) |        |          | Per capita costs                                                                                          |                                                                                                           |                  |                   |
|------|-----------|---------|---------------------------------------------------------------|---------------------------------------------------------------------------|-----------------|----------|-----|----------------------------|--------|----------|-----------------------------------------------------------------------------------------------------------|-----------------------------------------------------------------------------------------------------------|------------------|-------------------|
|      |           |         |                                                               |                                                                           |                 |          |     | Total                      | Direct | Indirect | Direct (LCU)                                                                                              | Direct (\$)                                                                                               | Indirect (LCU)   | Indirect (\$)     |
|      |           |         |                                                               | (excluding Indians)                                                       |                 |          |     |                            |        |          | urban: 3321 (1993), 3427 (2001), rural: 3368 (1993), 3289 (2001)                                          | (1993), 3563 (2001), rural: (1993), 3420 (2001)                                                           |                  |                   |
| [16] | 2000-2016 | CAN     | Whole pop. (with 34444 giving actual costs data for baseline) | General pop.                                                              | Healthc. system | SAM      | CAD | 5230 (2000) to 9140 (2016) |        |          | 3329 <sup>a</sup>                                                                                         | 3735 <sup>a</sup>                                                                                         |                  |                   |
| [56] | 1998      | CAN     | 1993920 (incl. undiagn. DM cases)                             | General pop.                                                              | Societal        | SDS      | CAD | 7857                       | 5746   | 2110     | 2587 <sup>a</sup>                                                                                         | 2882 <sup>a</sup>                                                                                         | 950 <sup>a</sup> | 1058 <sup>a</sup> |
| [52] | 1992-2001 | CAN     | 3469 with T2D                                                 | Incidence T2D patients form Saskatchewan Health's administrative database | Healthc. system | SDS      | CAD |                            |        |          | 3880 three years after diagnosis to 4441 after 10 years. The 10-year individual cumulative cost was 38006 | 4034 three years after diagnosis to 4618 after 10 years. The 10-year individual cumulative cost was 39517 |                  |                   |
| [43] | 1996      | CAN     | 38124                                                         | Diabetes patients form Saskatchewan Health's administrative database      | Healthc. system | SDS      | CAD | 151                        |        |          | 3524                                                                                                      | 3955                                                                                                      |                  |                   |
| [62] | 2001      | CAN     | 5284 (Indians) + 41630 (general pop.) with                    | Registered Indians according to the Indian Act                            | Healthc. system | RB/M     | CAD |                            |        |          | Excess costs: Indians 2227, General pop. 2378 (total costs with                                           | Excess costs: Indians 2316, General pop. 2473: (total costs with diabetes: 3766 for                       |                  |                   |

| Ref. | Horizon                    | Country | Sample size                                                       | Population                                           | Perspective     | Approach | LCU | Aggregate costs (mill. \$)  |                             |                          | Per capita costs                                                                                      |                                                                                  |                      |                    |
|------|----------------------------|---------|-------------------------------------------------------------------|------------------------------------------------------|-----------------|----------|-----|-----------------------------|-----------------------------|--------------------------|-------------------------------------------------------------------------------------------------------|----------------------------------------------------------------------------------|----------------------|--------------------|
|      |                            |         |                                                                   |                                                      |                 |          |     | Total                       | Direct                      | Indirect                 | Direct (LCU)                                                                                          | Direct (\$)                                                                      | Indirect (LCU)       | Indirect (\$)      |
|      |                            |         | diabetes, 11692 (Indians) + 98680 (general pop.) without diabetes |                                                      |                 |          |     |                             |                             |                          | diabetes: 3,622 for Indians/ 3253 in general pop., controls: 1,395 for Indians/ 875 for general pop.) | Indians/ 3382 in general pop., controls: 1450 for Indians/ 910 for general pop.) |                      |                    |
| [14] | 2000                       | CHL     | 496500                                                            | General pop.                                         | Societal        | SAM      | CLP | 5890                        | 719                         | 5171 <sup>b</sup>        | 320601 <sup>a</sup>                                                                                   | 1447 <sup>a</sup>                                                                | 2307131 <sup>a</sup> | 10416 <sup>a</sup> |
| [92] | 2007                       | CHN     | 1478                                                              | T2D patients in these Chinese hospitals              | Healthc. system | Survey   | RMB |                             |                             |                          | 4564 (median), 7926 (mean)                                                                            | 1246 (median), 2164 (mean)                                                       |                      |                    |
| [80] | 2007 and 2030 (projection) | CHN     | 2040                                                              | In-patients and out-patients with DM in 20 hospitals | Societal        | Survey   | RMB | 72916 (2007), 132472 (2030) | 67946 (2007), 123187 (2030) | 4982 (2007), 9058 (2030) | 11555                                                                                                 | 3401                                                                             | 1586                 | 467                |
| [13] | 2009-2010                  | CHN     | 1232 (diabetes), 1201 (no diabetes)                               | General pop.                                         | Healthc. system | RB/M     | RMB |                             |                             |                          | 4135 (3.38 times greater than controls)                                                               | 1136 (3.38 times greater than controls)                                          |                      |                    |
| [81] | 2007                       | CHN     | 2054                                                              | T2D patients in these Chinese hospitals              | Healthc. system | Survey   | RMB |                             |                             |                          | 4800 (median), 10164 (mean)                                                                           | 1412 (median), 2991 (mean)                                                       |                      |                    |
| [19] | 32 years                   | COL     | NA                                                                | Hypothetical average Columbian type 2 DM patient     | Societal        | SAM      | COP | 5330                        | 1817                        | 3513                     | 611750                                                                                                | 570                                                                              | 1187000              | 1106               |
| [14] | 2000                       | COL     | 937700                                                            | General pop.                                         | Societal        | SAM      | COP | 7737                        | 1241                        | 6496 <sup>b</sup>        | 923826 <sup>a</sup>                                                                                   | 1323 <sup>a</sup>                                                                | 4836001 <sup>a</sup> | 6928 <sup>a</sup>  |
| [14] | 2000                       | CRI     | 154900                                                            | General pop.                                         | Societal        | SAM      | CRC | 1026                        | 210                         | 817 <sup>b</sup>         | 192194 <sup>a</sup>                                                                                   | 1353 <sup>a</sup>                                                                | 749278 <sup>a</sup>  | 5274 <sup>a</sup>  |
| [14] | 2000                       | CUB     | 592400                                                            | General pop.                                         | Societal        | SAM      | CUP | 1721                        | 923                         | 798 <sup>b</sup>         | 1219 <sup>a</sup>                                                                                     | 1558 <sup>a</sup>                                                                | 1054 <sup>a</sup>    | 1347 <sup>a</sup>  |

| Ref. | Horizon    | Country | Sample size                                 | Population                                   | Perspective     | Approach | LCU | Aggregate costs (mill. \$)   |        |                   | Per capita costs           |                            |                            |                            |  |
|------|------------|---------|---------------------------------------------|----------------------------------------------|-----------------|----------|-----|------------------------------|--------|-------------------|----------------------------|----------------------------|----------------------------|----------------------------|--|
|      |            |         |                                             |                                              |                 |          |     | Total                        | Direct | Indirect          | Direct (LCU)               | Direct (\$)                | Indirect (LCU)             | Indirect (\$)              |  |
| [20] | 2007       | CZE     |                                             | Insured in healthcare system (63.1% of pop.) | Healthc. system | SAM      | CHK | 190                          |        |                   |                            |                            |                            |                            |  |
| [94] | 1993       | DNK     | 948                                         | General pop.                                 | Societal        | WTP      | DKK |                              |        |                   |                            |                            | 1128 (mean), 300 (median)  | 191 (mean), 51 (median)    |  |
| [14] | 2000       | DOM     | 254100                                      | General pop.                                 | Societal        | SAM      | DOP | 1410                         | 509    | 901 <sup>b</sup>  | 14580 <sup>a</sup>         | 2003 <sup>a</sup>          | 25801 <sup>a</sup>         | 3545 <sup>a</sup>          |  |
| [14] | 2000       | ECU     | 267300                                      | General pop.                                 | Societal        | SAM      | USD | 2830                         | 1104   | 1727 <sup>b</sup> | 873 <sup>a</sup>           | 4129 <sup>a</sup>          | 1366 <sup>a</sup>          | 6460 <sup>a</sup>          |  |
| [14] | 2000       | SLV     | 219400                                      | General pop.                                 | Societal        | SAM      | SVC | 1385                         | 381    | 1004 <sup>b</sup> | 626 <sup>a</sup>           | 1737 <sup>a</sup>          | 1650 <sup>a</sup>          | 4577 <sup>a</sup>          |  |
| [53] | 2005-2010  | FIN     | 1890 with T2D                               | People with T2D in two cities in Finland     | Healthc. system | SDS      | EUR |                              |        |                   | 1038                       | 1087                       |                            |                            |  |
| [63] | 1998, 2000 | FRA     | 704423 (1998), 1145603 (2000) with diabetes | Metropolitan France                          | Healthc. system | RB/M     | EUR | 2784 (1998), 3268 (2000)     |        |                   | 1529 (1998), 1655 (2000)   | 2107 (1998), 2241 (2000)   |                            |                            |  |
| [15] | 1999       | FRA     | 751 patients                                | General pop.                                 | Healthc. system | SAM      | EUR | 5478                         |        |                   | 3064                       | 4214                       |                            |                            |  |
| [15] | 1999       | DEU     | 809 patients                                | General pop.                                 | Healthc. system | SAM      | EUR | 1653                         |        |                   | 3576                       | 4752                       |                            |                            |  |
| [65] | 2001       | DEU     | 306736 (26971 with diabetes)                | General pop.                                 | Societal        | RB/M     | EUR | Excess: 19364 (total: 40650) |        |                   | Excess: 2507 (total: 5262) | Excess: 3329 (total: 6987) | Excess: 1328 (total: 5019) | Excess: 1763 (total: 6664) |  |
| [64] | 2000-2007  | DEU     | 320000 (2000) to 275000 (2007)              | AOK Hessen                                   | Healthc. system | RB/M     | EUR | 17299 (2000), 25614 (2007)   |        |                   | 2400 (2000), 2605 (2007)   | 3493 (2007), 3218 (2000)   |                            |                            |  |

| Ref. | Horizon    | Country | Sample size                                | Population                                                           | Perspective     | Approach | LCU | Aggregate costs (mill. \$)              |                                         |                                       | Per capita costs                           |                                         |                     |                   |
|------|------------|---------|--------------------------------------------|----------------------------------------------------------------------|-----------------|----------|-----|-----------------------------------------|-----------------------------------------|---------------------------------------|--------------------------------------------|-----------------------------------------|---------------------|-------------------|
|      |            |         |                                            |                                                                      |                 |          |     | Total                                   | Direct                                  | Indirect                              | Direct (LCU)                               | Direct (\$)                             | Indirect (LCU)      | Indirect (\$)     |
| [21] | 1995-2003  | DEU     | 3268                                       | Newly diagnosed T2D patients                                         | Healthc. system | SAM      | EUR |                                         |                                         |                                       | 3210                                       | 4075                                    |                     |                   |
| [66] | 2000-2009  | DEU     | not given, only DM patients stated (30472) | AOK Hessen                                                           | Healthc. system | RB/M     | EUR |                                         | 21230 (2000), 26226 (2009)              |                                       | 2779 (2000), 2611 (2009)                   | 3471 (2000), 3261 (2009)                |                     |                   |
| [14] | 2000       | GTM     | 368700                                     | General pop.                                                         | Societal        | SAM      | GTQ | 2535                                    | 878                                     | 1657 <sup>b</sup>                     | 6131 <sup>a</sup>                          | 2382 <sup>a</sup>                       | 11572 <sup>a</sup>  | 4495 <sup>a</sup> |
| [14] | 2000       | GUY     | 28400                                      | General pop.                                                         | Societal        | SAM      | GYD | 141                                     | 80                                      | 62 <sup>b</sup>                       | 131041 <sup>a</sup>                        | 2800 <sup>a</sup>                       | 102135 <sup>a</sup> | 2182 <sup>a</sup> |
| [14] | 2000       | HTI     | 79500                                      | General pop.                                                         | Societal        | SAM      | HTG | 249                                     | 152                                     | 97 <sup>b</sup>                       | 12782 <sup>a</sup>                         | 1912 <sup>a</sup>                       | 8175 <sup>a</sup>   | 1223 <sup>a</sup> |
| [14] | 2000       | HND     | 193000                                     | General pop.                                                         | Societal        | SAM      | HNL | 772                                     | 366                                     | 405 <sup>b</sup>                      | 8750 <sup>a</sup>                          | 1898 <sup>a</sup>                       | 9680 <sup>a</sup>   | 2100 <sup>a</sup> |
| [82] | 2004       | HKG     | 147                                        | T2D patients attending the DM outpatient clinic at a public hospital | Societal        | Survey   | USD |                                         |                                         |                                       | 11638                                      | 2288                                    | 1817 <sup>e</sup>   | 357 <sup>e</sup>  |
| [83] | 1998, 2005 | IND     | 556 with T2D (urban=309, rural=247)        | T2D patients in India                                                | Patient         | Survey   | INR |                                         |                                         |                                       | Median values: 10000 (urban), 6260 (rural) | Median values: 773 (urban), 484 (rural) |                     |                   |
| [91] | 2009       | IND     | 718                                        | Diabetes patients in Chennai city                                    | Societal        | Survey   | INR |                                         | 268                                     |                                       | 25391 (median)                             | 1557 (median)                           | 4970 (median)       | 305 (median)      |
| [84] | 2009       | IRN     | 4500                                       | Diabetes patients from Tehran and Fars province                      | Societal        | Survey   | IRR | 9611 <sup>h</sup>                       | 5187 <sup>h</sup>                       | 4420 <sup>h</sup>                     | 8358592                                    | 2142                                    | 8578816             | 2199              |
| [67] | 2004, 2005 | IRN     | 710 (T2D), 904 (controls)                  | Pop. in Teheran                                                      | Societal        | RB/M     | IRR | 401 (Teheran); 2117 <sup>h</sup> (Iran) | 327 (Teheran); 1727 <sup>h</sup> (Iran) | 74 (Teheran), 390 <sup>h</sup> (Iran) | 876622 (Teheran)                           | 443 (Teheran)                           | 200146 (Teheran)    | 101 (Teheran)     |

| Ref. | Horizon   | Country | Sample size                               | Population                                                   | Perspective     | Approach | LCU | Aggregate costs (mill. \$) |        |                    | Per capita costs                          |                                            |                    |                    |
|------|-----------|---------|-------------------------------------------|--------------------------------------------------------------|-----------------|----------|-----|----------------------------|--------|--------------------|-------------------------------------------|--------------------------------------------|--------------------|--------------------|
|      |           |         |                                           |                                                              |                 |          |     | Total                      | Direct | Indirect           | Direct (LCU)                              | Direct (\$)                                | Indirect (LCU)     | Indirect (\$)      |
| [22] | 1999      | IRL     | 701                                       | T2D patients of four Irish hospitals                         | Healthc. system | SAM      | EUR |                            |        |                    | 2469                                      | 2867                                       |                    |                    |
| [68] | 2001      | ISR     | 24632                                     | Insured patients in HMO                                      | Healthc. system | RB/M     | ILS | 433                        |        |                    | 6002 (2001),<br>3926 (1999)               | 1950 (2001),<br>1275 (1999)                |                    |                    |
| [23] | 1998      | ITA     | 1263                                      | T2D patients from randomly drawn practices across Italy      | Societal        | SAM      | EUR | 8289 <sup>d</sup>          | 7930   | 359                | 2991                                      | 4588                                       | 135 <sup>a,c</sup> | 208 <sup>a,c</sup> |
| [70] | 2003-2004 | ITA     | 33792 (diabetes) and 863123 (no diabetes) | Turin pop.                                                   | Healthc. system | RB/M     | EUR |                            |        |                    | 2465 (3361 (diabetes), 896 (no diabetes)) | 3328 (4537 (diabetes), 1210 (no diabetes)) |                    |                    |
| [24] | 2001-2002 | ITA     | 299                                       | T2D patients who visited a diabetologic center in Italy (DC) | Healthc. system | SAM      | EUR |                            |        |                    | 1910                                      | 2823                                       |                    |                    |
| [69] | 2006      | ITA     | 311979                                    | People with DM at 22 local health districts                  | Healthc. system | RB/M     | EUR |                            |        |                    | 2589                                      | 3296                                       |                    |                    |
| [41] | 2001      | JAM     | 186036                                    | General pop.                                                 | Societal        | SDS      | JMD | 556                        | 454    | 102                | 44647                                     | 2439                                       | 10046              | 549                |
| [14] | 2000      | JAM     | 181400                                    | General pop.                                                 | Societal        | SAM      | JMD | 1037                       | 345    | 693 <sup>a</sup>   | 32251 <sup>a</sup>                        | 1901 <sup>a</sup>                          | 64787 <sup>a</sup> | 3818 <sup>a</sup>  |
| [25] | 1990-2001 | JPN     | 4535                                      | Community-dwelling in Shiga                                  | Healthc. system | SAM      | JPY |                            |        |                    | 189060 (diabetes), 99900 (non-diabetes)   | 1674 (diabetes), 884 (non-diabetes)        |                    |                    |
| [14] | 2000      | LAC     | Diabetes prevalence                       | Pop. from all countries in                                   | Societal        | SAM      | USD | 82304                      | 13529  | 68774 <sup>b</sup> | 703 <sup>a</sup>                          | 887 <sup>a</sup>                           | 3576 <sup>a</sup>  | 4512 <sup>a</sup>  |

| Ref. | Horizon    | Country | Sample size                        | Population                                                                             | Perspective     | Approach | LCU | Aggregate costs (mill. \$) |            |                                                    | Per capita costs          |                          |                          |                         |
|------|------------|---------|------------------------------------|----------------------------------------------------------------------------------------|-----------------|----------|-----|----------------------------|------------|----------------------------------------------------|---------------------------|--------------------------|--------------------------|-------------------------|
|      |            |         |                                    |                                                                                        |                 |          |     | Total                      | Direct     | Indirect                                           | Direct (LCU)              | Direct (\$)              | Indirect (LCU)           | Indirect (\$)           |
| [14] | 2000       | MEX     | 3738000                            | of 15.2 million<br>Latin America and Caribbean<br>General pop.                         | Societal        | SAM      | MXN | 30677                      | 4006       | 26671 <sup>b</sup>                                 | 4994 <sup>a</sup>         | 1072 <sup>a</sup>        | 33249 <sup>a</sup>       | 7135 <sup>a</sup>       |
| [28] | 2004, 2006 | MEX     | 951417                             | 951417 estimated cases<br>All users of health care in public institutions              | Societal        | SAM      | MXN | 290 <sup>d</sup>           | 229        | 61 <sup>k</sup>                                    | 1472 <sup>a</sup>         | 242 <sup>a</sup>         | 386 <sup>a</sup>         | 64 <sup>a</sup>         |
| [29] | 2010       | MEX     | Whole pop.                         | Whole pop.<br>Population demanding services at Mexican healthcare institutions for T2D | Societal        | SAM      | MXN | 1066                       | 470        | 596                                                | 4016 <sup>a</sup>         | 485 <sup>a</sup>         | 5090 <sup>a</sup>        | 610 <sup>a</sup>        |
| [26] | 2005       | MEX     | Whole pop.                         | Whole pop.<br>General pop.                                                             | Patient         | SAM      | MXN |                            |            | 284 OOP expenditures (52% of overall expenditures) |                           |                          |                          |                         |
| [27] | 2003, 2005 | MEX     | Whole pop.                         | Whole pop.<br>General pop. using public healthcare institutions                        | Societal        | SAM      | MXN | 532 (2005)                 | 235 (2005) | 297 (2005)                                         | 1467 <sup>a</sup> (2005)  | 263 <sup>a</sup> (2005)  | 1852 <sup>a</sup> (2005) | 331 <sup>a</sup> (2005) |
| [44] | 2002, 2004 | MEX     | 497                                | 497<br>IMSS insured                                                                    | Healthc. system | SDS      | MXN |                            |            | 661 (2004)                                         | 35622 <sup>a</sup> (2004) | 4672 <sup>a</sup> (2004) |                          |                         |
| [30] | 1998       | NLD     | 1371 with T2D                      | 1371 with T2D<br>T2D patients in the Netherlands                                       | Societal        | SAM      | NLG | 1014 <sup>d</sup>          | 953        | 61                                                 | 4023                      | 2780                     | 282 <sup>a</sup>         | 195 <sup>a</sup>        |
| [79] | 2000-2004  | NLD     | 2.5 million (641200 with diabetes) | 2.5 million (641200 with diabetes)<br>Dutch people with diabetes                       | Healthc. system | RB/M     | EUR |                            |            | 571 (2000), 1063 (2004)                            | 974 (2000), 1283 (2004)   | 1259 (2000), 1658 (2004) |                          |                         |



| Ref. | Horizon                 | Country | Sample size                                   | Population                                         | Perspective     | Approach | LCU | Aggregate costs (mill. \$) |        |                   | Per capita costs     |                   |                      |                   |
|------|-------------------------|---------|-----------------------------------------------|----------------------------------------------------|-----------------|----------|-----|----------------------------|--------|-------------------|----------------------|-------------------|----------------------|-------------------|
|      |                         |         |                                               |                                                    |                 |          |     | Total                      | Direct | Indirect          | Direct (LCU)         | Direct (\$)       | Indirect (LCU)       | Indirect (\$)     |
| [15] | 1999                    | NLD     | 909 patients                                  | General pop.                                       | Healthc. system | SAM      | EUR | 671                        |        |                   | 1827                 | 2761              |                      |                   |
| [14] | 2000                    | NIC     | 136100                                        | General pop.                                       | Societal        | SAM      | NIO | 442                        | 292    | 150 <sup>b</sup>  | 7922 <sup>a</sup>    | 2145 <sup>a</sup> | 4082 <sup>a</sup>    | 1105 <sup>a</sup> |
| [12] | July 2003-<br>June 2004 | NGA     | 35                                            | Diabetes patients in out-patient clinic in Nigeria | Patient         | SDS      | NGN |                            |        |                   | 29366                | 662               |                      |                   |
| [45] | 2005                    | NOR     | 4.6 million from register data of entire pop. | General pop.                                       | Societal        | SDS      | NRK | 319                        | 242    | 76                | 20492 <sup>a</sup>   | 2061 <sup>a</sup> | 5067 <sup>a</sup>    | 650 <sup>a</sup>  |
| [85] | 2006                    | PAK     | 345                                           | Diabetes patients in Karachi                       | Societal        | Survey   | PKR |                            |        |                   | 11580 <sup>f</sup>   | 620 <sup>f</sup>  | 840 <sup>e</sup>     | 45 <sup>e</sup>   |
| [14] | 2000                    | PAN     | 120500                                        | General pop.                                       | Societal        | SAM      | PAB | 926                        | 222    | 704 <sup>b</sup>  | 866 <sup>a</sup>     | 1846 <sup>a</sup> | 2741 <sup>a</sup>    | 5840 <sup>a</sup> |
| [14] | 2000                    | PRY     | 94300                                         | General pop.                                       | Societal        | SAM      | PYG | 738                        | 244    | 495 <sup>b</sup>  | 2661903 <sup>a</sup> | 2587 <sup>a</sup> | 5397747 <sup>a</sup> | 5245 <sup>a</sup> |
| [14] | 2000                    | PER     | 606800                                        | General pop.                                       | Societal        | SAM      | PEN | 5627                       | 1533   | 4094 <sup>b</sup> | 2890 <sup>a</sup>    | 2526 <sup>a</sup> | 7717 <sup>a</sup>    | 6746 <sup>a</sup> |
| [61] | 2009                    | POL     | Whole pop                                     | All Polish diabetes patients                       | Healthc. system | SDS      | RSD | 3396                       | 1910   | 1486              |                      |                   |                      |                   |
| [86] | 2007                    | SRB     | 99                                            | T2D patients in health centre in Svilajnac         | Societal        | Survey   | RSD | 7579 <sup>h</sup>          |        |                   | 47865                | 1610              | 5548                 | 187               |
| [31] | 2002                    | SRB     | 360433 people with T2D in Serbia              | Serbian T2D patients                               | Healthc. system | SAM      | RSD |                            | 280    |                   | 12457 <sup>a</sup>   | 761 <sup>a</sup>  |                      |                   |
| [47] | 1998                    | ESP     | 1004                                          | Diabetes patients from 29 primary                  | Healthc. system | SDS      | EUR |                            |        |                   | 771                  | 1488              |                      |                   |

| Ref. | Horizon       | Country | Sample size                                        | Population                                              | Perspective     | Approach | LCU            | Aggregate costs (mill. \$) |                                   |                        | Per capita costs                  |                                   |                                                      |                                                    |
|------|---------------|---------|----------------------------------------------------|---------------------------------------------------------|-----------------|----------|----------------|----------------------------|-----------------------------------|------------------------|-----------------------------------|-----------------------------------|------------------------------------------------------|----------------------------------------------------|
|      |               |         |                                                    |                                                         |                 |          |                | Total                      | Direct                            | Indirect               | Direct (LCU)                      | Direct (\$)                       | Indirect (LCU)                                       | Indirect (\$)                                      |
| [46] | 1999          | ESP     | 517                                                | healthcare centres<br>People with DM in region of Cadiz | Societal        | SDS      | EUR            |                            |                                   |                        | 2560                              | 4690                              | 1844                                                 | 3379                                               |
| [32] | 2002          | ESP     | 1675304 to 2010365 depending on assumed prevalence | Diabetes patients in National Health System             | Healthc. system | SAM      | EUR            |                            | 4010 (6% prev.) – 4461 (5% prev.) |                        | 1290 (6% prev.) – 1476 (5% prev.) | 2155 (6% prev.) – 2466 (5% prev.) |                                                      |                                                    |
| [15] | 1999          | ESP     | 1004 patients                                      | General pop.                                            | Healthc. system | SAM      | EUR            |                            | 3679                              |                        | 1305                              | 2453                              |                                                      |                                                    |
| [54] | 1998          | ESP     | Whole pop. (exact number not given)                | Canary Island pop. with diabetes                        | Societal        | SDS      | Pts (pre Euro) | 75                         | 47                                | 28                     | 78240                             | 907                               | 47928 <sup>b</sup>                                   | 556 <sup>b</sup>                                   |
| [87] | 2005          | SDN     | 822                                                | Patients with T2D in Khartoum state in Sudan            | Patient         | Survey   | USD            |                            |                                   |                        | 438                               | 456                               |                                                      |                                                    |
| [59] | 1987 and 2005 | SWE     | Whole pop.                                         | General pop.                                            | Societal        | SDS      | SEK            | 499 (1987), 1045 (2005)    | 223 (1987), 383 (2005)            | 276 (1987), 662 (2005) | 12102 (1987), 12287 (2005)        | 1484 (1987), 1507 (2005)          | 15000 <sup>a</sup> (1987), 21253 <sup>a</sup> (2005) | 1840 <sup>a</sup> (1987), 2606 <sup>a</sup> (2005) |
| [71] | 1993          | SWE     | 70786 (1677 with diabetes)                         | Southern Sweden                                         | Societal        | RB/M     | SEK            |                            |                                   |                        | 19411                             | 2855                              | 14777                                                | 2174                                               |
| [72] | 2005          | SWE     | 415990 (19226 with diabetes)                       | Whole Östergötland population                           | Healthc. system | RB/M     | EUR            |                            |                                   |                        | 18293                             | 2243                              |                                                      |                                                    |
| [15] | 1999          | SWE     | 773 patients                                       | General pop.                                            | Healthc. system | SAM      | SEK            |                            | 929                               |                        | 24927                             | 3319                              |                                                      |                                                    |

| Ref. | Horizon   | Country | Sample size                            | Population                                                    | Perspective     | Approach | LCU | Aggregate costs (mill. \$) |        |                  | Per capita costs           |                          |                    |                   |
|------|-----------|---------|----------------------------------------|---------------------------------------------------------------|-----------------|----------|-----|----------------------------|--------|------------------|----------------------------|--------------------------|--------------------|-------------------|
|      |           |         |                                        |                                                               |                 |          |     | Total                      | Direct | Indirect         | Direct (LCU)               | Direct (\$)              | Indirect (LCU)     | Indirect (\$)     |
| [33] | 2004      | SWE     | 8230                                   | Diabetes patients in Uppsala county                           | Healthc. system | SAM      | SEK |                            |        |                  | 33210                      | 3888                     |                    |                   |
| [57] | 1998      | CHE     | 1479                                   | T2D patients from randomly drawn practices across Switzerland | Healthc. system | SDS      | CHF | 561                        |        |                  | 3004                       | 2030                     |                    |                   |
| [48] | 1998-1999 | TWN     | 20757185 (in 1998), 21089859 (in 1999) | People with DM in National Health Insurance                   | Healthc. system | SDS      | TWD |                            |        |                  | 62617 (1998), 60775 (1999) | 3499 (1998), 3396 (1999) |                    |                   |
| [93] | 2006-2007 | TWN     | 498                                    | Diabetes patients in out-patient clinics in northern Taiwan   | Societal        | WTP      | TWD |                            |        | 4003             |                            |                          | 68118              | 4004              |
| [34] | NA        | TWN     | 16094                                  | Elderly with DM in Taiwan                                     | Healthc. system | SAM      | TWD | 51                         |        |                  | 111982                     | 6338                     |                    |                   |
| [88] | 2008      | THA     | 475                                    | Diabetes patients treated in district hospital                | Societal        | Survey   | THB |                            |        |                  | 17638                      | 1082                     | 10569              | 649               |
| [14] | 2000      | TTO     | 71300                                  | Pop. from all countries in Latin America and Caribbean        | Societal        | SAM      | TTD | 540                        | 72     | 468 <sup>b</sup> | 3358 <sup>a</sup>          | 1011 <sup>a</sup>        | 21780 <sup>a</sup> | 6560 <sup>a</sup> |
| [41] | 2001      | TTO     | 135093                                 | General pop.                                                  | Societal        | SDS      | TTD | 852                        | 227    | 625              | 5722                       | 1677                     | 15797              | 4628              |

| Ref. | Horizon    | Country | Sample size                             | Population                                      | Perspective     | Approach | LCU | Aggregate costs (mill. \$)                    |                                                                         |                                                               | Per capita costs                                                      |                                                                       |                                                                             |                                                                             |
|------|------------|---------|-----------------------------------------|-------------------------------------------------|-----------------|----------|-----|-----------------------------------------------|-------------------------------------------------------------------------|---------------------------------------------------------------|-----------------------------------------------------------------------|-----------------------------------------------------------------------|-----------------------------------------------------------------------------|-----------------------------------------------------------------------------|
|      |            |         |                                         |                                                 |                 |          |     | Total                                         | Direct                                                                  | Indirect                                                      | Direct (LCU)                                                          | Direct (\$)                                                           | Indirect (LCU)                                                              | Indirect (\$)                                                               |
| [89] | 2004       | ARE     | 150                                     | Diabetes patients in Al-Ain District            | Healthc. system | Survey   | AED |                                               |                                                                         |                                                               | no complication: 5906, with complications: 20774, overall: 16115      | no complications: 2047, with complications: 7199, overall: 5585       |                                                                             |                                                                             |
| [15] | 1999       | GBR     | 756 patients                            | General pop.                                    | Healthc. system | SAM      | GBP | 244                                           |                                                                         |                                                               | 1558                                                                  | 3065                                                                  |                                                                             |                                                                             |
| [58] | 2007       | USA     | Diabetes prevalence of 16.5 million     | General pop.                                    | Societal        | SDS      | USD | 167862                                        | 111257                                                                  | 56604                                                         | 6414                                                                  | 6751                                                                  | 3263                                                                        | 3434                                                                        |
| [50] | 1998       | USA     | 127991                                  | Medicaid pop.                                   | Healthc. system | SDS      | USD |                                               | 540                                                                     |                                                               | 4098                                                                  | 4221                                                                  |                                                                             |                                                                             |
| [49] | 2002       | USA     | Diagnosed DM prevalence of 12.1 million | General pop.                                    | Societal        | SDS      | USD | 161896                                        | 112947                                                                  | 48948                                                         | 7601 <sup>1</sup>                                                     | 9346 <sup>1</sup>                                                     | 3294 <sup>a</sup>                                                           | 4050 <sup>a</sup>                                                           |
| [90] | 1996       | USA     | 23200                                   | General pop.                                    | Societal        | Survey   | USD | 78518 (total healthc. costs + indirect costs) | 13768 (attributed to diabetes by patient), 73884 (total healthc. costs) | 4771 (based on work-loss days (for any health-related cause)) | 1097 (attributed to diabetes by patient), 5646 (total healthc. costs) | 1495 (attributed to diabetes by patient), 7694 (total healthc. costs) | 380 <sup>a,c</sup> (based on work-loss days (for any health-related cause)) | 518 <sup>a,c</sup> (based on work-loss days (for any health-related cause)) |
| [74] | 2000, 2005 | USA     | 21592 (2000), 127254 (2005)             | Employees of large, privately-insured companies | Healthc. system | RB/M     | USD |                                               |                                                                         |                                                               | 7365 (2000), 7327 (2005)                                              | 8349 (2000), 8306 (2005)                                              |                                                                             |                                                                             |
| [77] | 2000-2004  | USA     | 3790 (diabetes), 42413 (no diabetes)    | General pop.                                    | Healthc. system | RB/M     | USD |                                               |                                                                         |                                                               | 5035 <sup>1</sup>                                                     | 5708 <sup>1</sup>                                                     |                                                                             |                                                                             |

| Ref. | Horizon           | Country | Sample size                              | Population                                        | Perspective     | Approach     | LCU | Aggregate costs (mill. \$)                        |        |          | Per capita costs                                                                            |                                                                                            |                |               |
|------|-------------------|---------|------------------------------------------|---------------------------------------------------|-----------------|--------------|-----|---------------------------------------------------|--------|----------|---------------------------------------------------------------------------------------------|--------------------------------------------------------------------------------------------|----------------|---------------|
|      |                   |         |                                          |                                                   |                 |              |     | Total                                             | Direct | Indirect | Direct (LCU)                                                                                | Direct (\$)                                                                                | Indirect (LCU) | Indirect (\$) |
| [37] | 2000              | USA     | 1364                                     | People with T2D enrolled in managed care programs | Healthc. system | SAM          | USD |                                                   |        |          | 3715 (median)                                                                               | 4747 (median)                                                                              |                |               |
| [76] | 2005              | USA     | 32052                                    | American Indians in and around Phoenix, Arizona   | Healthc. system | RB/M         | USD |                                                   |        |          | 5542                                                                                        | 6282                                                                                       |                |               |
| [38] | 1996              | USA     | 20937 with diabetes                      | Employed DM patients                              | Healthc. system | SAM          | USD | 126                                               |        |          | 4430 (17.9% OOP)                                                                            | 6039 (17.9% OOP)                                                                           |                |               |
| [75] | 2006              | USA     | 3551 (diabetes), 8686 (no diabetes)      | General pop.                                      | Patient         | RB/M         | USD |                                                   |        |          | 233                                                                                         | 264                                                                                        |                |               |
| [60] | 1998-2003         | USA     | 96873 (5289 had diabetes)                | General pop.                                      | Healthc. system | SDS and RB/M | USD | 61958 (regression), 43452 (attributable fraction) |        |          | 4240 (regression), 2980 (attributable fraction)                                             | 4966 (regression), 3490 (attributable fraction)                                            |                |               |
| [40] | 1998              | USA     | 429918                                   | US veterans                                       | Healthc. system | SAM          | USD | 2214                                              |        |          | 3888 <sup>a</sup>                                                                           | 5150 <sup>a</sup>                                                                          |                |               |
| [73] | 1997-1998         | USA     | 3759 (diabetes), 3759 (without diabetes) | Employed and retired women                        | Healthc. system | RB/M         | USD |                                                   |        |          | 5.500 for women < age 65 per year, 25000 for women ≥ age 65 per year, 233000 lifetime costs | 6680 for women < age 65 per year, 30362 for women ≥ age 65 per year, 282973 lifetime costs |                |               |
| [35] | 10 year follow up | USA     | 1223 with T2D                            | People with DM in Michigan                        | Healthc. system | SAM          | USD |                                                   |        |          | 7100 (undiscounted per year over 10 year period)                                            | 9072 (undiscounted per year over 10 year period)                                           |                |               |
| [55] | 2007              | USA     | Diagnosed DM                             | General pop.                                      | Societal        | SDS          | USD | 185682                                            | 123788 | 62108    | 6649                                                                                        | 7095                                                                                       | 3328           | 3552          |

| Ref. | Horizon | Country            | Sample size                                                   | Population                                              | Perspective     | Approach     | LCU | Aggregate costs (mill. \$) |        |                   | Per capita costs                                                 |                                                                  |                    |                   |
|------|---------|--------------------|---------------------------------------------------------------|---------------------------------------------------------|-----------------|--------------|-----|----------------------------|--------|-------------------|------------------------------------------------------------------|------------------------------------------------------------------|--------------------|-------------------|
|      |         |                    |                                                               |                                                         |                 |              |     | Total                      | Direct | Indirect          | Direct (LCU)                                                     | Direct (\$)                                                      | Indirect (LCU)     | Indirect (\$)     |
| [51] | 2007    | USA                | prevalence of 17.5 million<br>256245 (T2D), 256223 (controls) | Non-institutionalized adults                            | Healthc. system | SDS and RB/M | USD |                            |        |                   | Matching: 4217, Disease attributable: 3002                       | Matching: 4500, Disease attributable: 3204                       |                    |                   |
| [36] | 2007    | USA                | 7514 with diabetes                                            | US pop. with positive healthcare expenditures in survey | Healthc. system | SAM          | USD |                            |        |                   | 11167 <sup>b</sup>                                               | 11917 <sup>b</sup>                                               |                    |                   |
| [78] | 1998    | USA                | 8748 diabetes patients, 8748 matched controls                 | Employees of large, privately-insured companies         | Employer        | RB/M         | USD |                            |        |                   | 3842                                                             | 5021                                                             | 568                | 743               |
| [39] | 2000    | USA                | 984 with DM (540 white, 210 African American, 234 Hispanic)   | White, African Americans and Hispanics in the US        | Healthc. system | SAM          | USD |                            |        |                   | 6616 (6887 if white, 6162 if African American, 5647 if Hispanic) | 8453 (8799 if white, 7873 if African American, 7215 if Hispanic) |                    |                   |
| [14] | 2000    | URY                | 119000                                                        | General pop.                                            | Societal        | SAM          | UYU | 1202                       | 147    | 1055 <sup>b</sup> | 9619 <sup>a</sup>                                                | 1233 <sup>a</sup>                                                | 69171 <sup>a</sup> | 8867 <sup>a</sup> |
| [14] | 2000    | VEN                | 610800                                                        | General pop.                                            | Societal        | SAM          | VEF | 4820                       | 317    | 4503 <sup>b</sup> | 342 <sup>a</sup>                                                 | 518 <sup>a</sup>                                                 | 2100a              | 7373 <sup>a</sup> |
| [9]  | 2005    | WHO African region | 7020000                                                       | General pop.                                            | societal        | SAM          | \$  | 28610                      | 9090   | 19520             | 876                                                              | 983                                                              | 10556              | 11845             |

DM Diabetes Mellitus *Healthc. System* Healthcare system *LCU* Local currency unit *Pop.* Population *Prev.* Prevalence *Ref.* Reference *RB/M* regression based/matching *SAM* Sum-all medical *SDS* Sum-diagnosis specific

<sup>a</sup> Own calculation dividing presented aggregate cost estimate by number of people with diabetes in study

<sup>b</sup> Total and direct cost estimates were presented in paper and indirect costs calculated, but not explicitly stated. We calculated indirect costs by deducting the

presented direct costs estimate from the presented total costs estimate to arrive at an indirect costs estimate

<sup>c</sup> Calculated the number of people with diabetes by dividing the aggregated direct costs and the per capita direct costs estimate as presented in the study

<sup>d</sup> Calculated total costs of diabetes for papers summing up direct and indirect costs

<sup>e</sup> Calculated per capita indirect costs deducting direct from total cost estimate presented in study

<sup>f</sup> Costs originally presented per visit, to arrive at yearly costs had to multiply costs per visit by number of visits per year

<sup>g</sup> Per capita direct costs were presented for different groups of diabetics, calculated average costs for person with diabetes by summing up and weighting costs for non-obese people with diabetes without hypertension, people with diabetes + hypertension, people with diabetes + obesity, people with diabetes + obesity + hypertension

<sup>h</sup> The study assumes sample would be nationally representative

<sup>i</sup> Study only reported the adjusted incremental cost ratio of 2.39 compared to the average healthcare expenditures of people without diabetes of US\$3630. To calculate the incremental costs of a person with diabetes we multiplied the average healthcare expenditures of people without diabetes by the given cost ratio to arrive at the average healthcare expenditures of people with diabetes. We then deducted from this the average healthcare expenditures of people without diabetes to arrive at the incremental cost estimate

<sup>j</sup> Study did not provide the year of costing which is why we present the estimate as provided in the study and refrained from presenting any estimates in international dollar. The estimate presents the per capita direct costs across all included countries

<sup>k</sup> Calculated indirect costs by using presented percentages indicating indirect costs relative to direct costs

<sup>l</sup> Direct costs attributable to diabetes estimated as difference between total healthcare costs of people with diabetes and total healthcare costs of people without diabetes adjusting for demographic differences
