# Supplementary material for: The Economic Costs of Type 2 Diabetes: A Global Systematic Review
Source: Springer Nature journal article supplement (doi:10.1007/s40273-015-0268-9), 2015-03-18
Supplement: MOESM3 [file 24129734]

# The economic costs of type 2 diabetes: a global systematic review

Pharmacoeconomics

Till Seuring<sup>1</sup>, Olga Archangelidi<sup>2</sup>, Marc Suhrcke<sup>1,3,4</sup>

<sup>1</sup>Health Economics Group, Norwich Medical School, University of East Anglia, Norwich, United Kingdom, Email: T.Seuring@uea.ac.uk

<sup>2</sup>Clinical Epidemiology Group, Department of Epidemiology and Public Health, University College London, London, United Kingdom

<sup>3</sup>Centre for Health Economics, University of York, York, United Kingdom

<sup>4</sup>UKCRC Centre for Diet and Activity Research (CEDAR), Cambridge, United Kingdom

**Table ESM3** Costing components included in studies estimating direct costs

| Ref. | Country<br>(year of cost<br>data) | Hospital<br>Visits | Outpatient<br>Visits | Physician<br>Visits            | Drugs | Laboratory | Equipment | Non-<br>medical | Other<br>Costs | Two main cost<br>contributors                                    |
|------|-----------------------------------|--------------------|----------------------|--------------------------------|-------|------------|-----------|-----------------|----------------|------------------------------------------------------------------|
| [10] | LMIC (2002-<br>2003)              |                    |                      | No breakdown of costs provided |       |            |           |                 |                | NA                                                               |
| [9]  | AFR (2000-<br>2005)               | x                  | x                    | x                              | x     | x          | x         | x               | x              | No exact information on<br>share in expenditures is<br>available |
| [42] | AUS (1993-<br>1996)               | x                  | x                    | x                              | x     | x          | x         |                 |                | No exact information on<br>share in expenditures is<br>available |
| [17] | CAN (1995-<br>2007)               | x                  | x                    | x                              |       |            |           |                 |                | Hospital, physician                                              |
| [18] | CAN (1993-<br>2001)               | x                  | x                    | x                              | x     | x          | x         |                 |                | Hospital, medication                                             |
| [16] | CAN (1996)                        | x                  | x                    | x                              | x     | x          | x         |                 |                | Hospital, medication                                             |
| [56] | CAN (1998)                        | x                  | x                    | x                              | x     | x          |           |                 |                | No exact information on<br>share in expenditures is<br>available |
| [52] | CAN (1992-<br>2001)               | x                  | x                    | x                              | x     |            |           |                 |                | Hospital                                                         |
| [43] | CAN (1991-<br>1996)               | x                  | x                    | x                              | x     |            |           |                 |                | Hospital, prescription<br>drugs                                  |

| Ref. | Country<br>(year of cost<br>data) | Hospital<br>Visits | Outpatient<br>Visits | Physician<br>Visits            | Drugs | Laboratory | Equipment | Non-<br>medical | Other<br>Costs | Two main cost<br>contributors                                           |
|------|-----------------------------------|--------------------|----------------------|--------------------------------|-------|------------|-----------|-----------------|----------------|-------------------------------------------------------------------------|
| [62] | CAN (1991-<br>2001)               | x                  | x                    | x                              |       |            |           |                 |                | Hospital                                                                |
| [92] | CHN (2007)                        | x                  | x                    | x                              |       |            |           | x               |                | Complications, insulin<br>therapy                                       |
| [80] | CHN (2007)                        | x                  | x                    |                                |       |            |           | x               |                | Hospital, outpatient visits                                             |
| [13] | CHN (2009-<br>2010)               | x                  | x                    | x                              | x     | x          | x         |                 |                | Hospital, medication                                                    |
| [81] | CHN (2007)                        | x                  | x                    | x                              | x     | x          | x         | x               |                | No exact information on<br>share in expenditures<br>available           |
| [19] | COL (2007)                        |                    |                      | No breakdown of costs provided |       |            |           |                 |                | NA                                                                      |
| [20] | CZE (2007)                        | x                  | x                    | x                              | x     | x          | x         |                 |                | Hospital, medication                                                    |
| [53] | FIN (2005-<br>2010)               | x                  | x                    | x                              | x     | x          | x         |                 |                |                                                                         |
| [63] | FRA<br>(1998,2000)                | x                  | x                    | x                              |       |            |           | x               |                | Hospital, medication                                                    |
| [65] | DEU (2001)                        | x                  | x                    | x                              | x     | x          | x         | x               |                | Hospital, medication                                                    |
| [64] | DEU (2000-<br>2007)               | x                  | x                    | x                              | x     | x          | x         | x               | x              | Hospital, other services<br>(medical devices,<br>remedies, professional |

| Ref. | Country<br>(year of cost<br>data) | Hospital<br>Visits | Outpatient<br>Visits | Physician<br>Visits | Drugs | Laboratory | Equipment | Non-<br>medical | Other<br>Costs | Two main cost<br>contributors                                                                     |
|------|-----------------------------------|--------------------|----------------------|---------------------|-------|------------|-----------|-----------------|----------------|---------------------------------------------------------------------------------------------------|
| [21] | DEU (1995-<br>2003)               | x                  | x                    | x                   | x     | x          | x         |                 |                | home nursing,<br>transportation)<br>No exact information on<br>share in expenditures<br>available |
| [66] | DEU (2000-<br>2009)               | x                  | x                    | x                   | x     | x          | x         | x               | x              | Hospital, medication                                                                              |
| [15] | EUR (1999)                        | x                  | x                    | x                   | x     | x          | x         | x               |                | Hospital, medication                                                                              |
| [82] | HKG (2004)                        | x                  | x                    | x                   | x     | x          | x         | x               | x              | Hospital, outpatient clinic<br>visits                                                             |
| [83] | IND (2005)                        | x                  | x                    | x                   | x     | x          | x         |                 |                | Hospital/surgery,<br>medication                                                                   |
| [91] | IND (2009)                        | x                  | x                    | x                   |       |            |           | x               |                | Hospital, medication                                                                              |
| [84] | IRN (2009)                        | x                  | x                    | x                   | x     | x          | x         | x               | x              | Complications,<br>medication                                                                      |
| [67] | IRN<br>(2004,2005)                | x                  | x                    | x                   | x     | x          | x         | x               |                | Hospital, medication and<br>devices                                                               |
| [22] | IRL (1999-<br>2000)               | x                  | x                    | x                   | x     | x          |           |                 |                | Hospital,<br>ambulatory/drug costs                                                                |
| [68] | ISR (1999-<br>2001)               | x                  | x                    | x                   | x     |            |           |                 |                | Medication and<br>lab/diagnostics                                                                 |
| [23] | ITA (1999)                        | x                  | x                    | x                   | x     | x          |           |                 |                | Hospital, drugs                                                                                   |

| Ref. | Country<br>(year of cost<br>data) | Hospital<br>Visits | Outpatient<br>Visits | Physician<br>Visits            | Drugs | Laboratory | Equipment | Non-<br>medical | Other<br>Costs | Two main cost<br>contributors                                 |
|------|-----------------------------------|--------------------|----------------------|--------------------------------|-------|------------|-----------|-----------------|----------------|---------------------------------------------------------------|
| [70] | ITA (August<br>2003-July<br>2004) | x                  | x                    |                                | x     | x          |           |                 |                | Hospital, drugs                                               |
| [24] | ITA (Jan<br>2001-Aug<br>2002)     | x                  |                      | x                              | x     | x          |           |                 |                | Hospital, drugs                                               |
| [69] | ITA (1997-<br>2006)               | x                  |                      | x                              | x     | x          | x         |                 |                | Hospital, drugs                                               |
| [25] | JPN (1990-<br>2001)               |                    |                      | No breakdown of costs provided |       |            |           |                 |                | NA                                                            |
| [14] | LAC (2000)                        | x                  | x                    | x                              | x     |            |           |                 |                | Medication,<br>complications                                  |
| [28] | MEX (1989-<br>2003)               | x                  | x                    | x                              | x     | x          |           |                 |                | No exact information on<br>share in expenditures<br>available |
| [29] | MEX (1990-<br>2008)               | x                  | x                    | x                              | x     | x          |           |                 |                | Medication,<br>complications                                  |
| [27] | MEX (1989-<br>2002)               | x                  | x                    | x                              | x     | x          |           |                 |                | Drugs, complications                                          |
| [26] | MEX (2002-<br>2004)               | x                  | x                    | x                              | x     | x          |           |                 |                | Drugs, complications                                          |
| [44] | MEX (2002-<br>2004)               | x                  | x                    | x                              | x     | x          | x         |                 | x              | Hospital, administrative<br>costs                             |

| Ref. | Country<br>(year of cost<br>data) | Hospital<br>Visits | Outpatient<br>Visits | Physician<br>Visits | Drugs | Laboratory | Equipment | Non-<br>medical | Other<br>Costs | Two main cost<br>contributors                                            |
|------|-----------------------------------|--------------------|----------------------|---------------------|-------|------------|-----------|-----------------|----------------|--------------------------------------------------------------------------|
| [30] | NLD (1998)                        | x                  | x                    | x                   | x     | x          | x         | x               |                | Hospital, medication                                                     |
| [79] | NLD (2000-<br>2004)               | x                  |                      |                     | x     |            |           |                 |                | Hospital, medication                                                     |
| [12] | NGA (2003-<br>2004)               |                    | x                    |                     | x     | x          | x         | x               | x              | Drugs, diagnostic tests                                                  |
| [45] | NOR (2005)                        | x                  | x                    | x                   | x     |            | x         |                 | x              | Drugs, medical devices                                                   |
| [85] | PAK (2006)                        |                    | x                    |                     | x     | x          |           | x               |                | Medicine cost, laboratory<br>costs                                       |
| [61] | POL (2005-<br>2009)               | x                  | x                    | x                   | x     | x          | x         |                 |                | Medication, primary care                                                 |
| [86] | SRB (2007)                        | x                  | x                    | x                   | x     | x          | x         |                 |                | Medication, medical<br>services (incl. ambulatory<br>and hospital costs) |
| [31] | SRB (2002)                        |                    | x                    | x                   | x     | x          | x         |                 |                | No exact information on<br>share in expenditures<br>available            |
| [47] | ESP (1998-<br>1999)               | x                  | x                    | x                   | x     | x          | x         |                 |                | Drugs, hospital                                                          |
| [46] | ESP (1999)                        | x                  | x                    | x                   | x     |            | x         |                 | x              | Medication, hospital                                                     |
| [32] | ESP (2002)                        | x                  | x                    | x                   |       |            |           |                 |                | Hospital, medication                                                     |
| [54] | ESP (1998)                        | x                  | x                    | x                   | x     | x          |           |                 |                | Hospital, medication                                                     |

| Ref. | Country<br>(year of cost<br>data) | Hospital<br>Visits | Outpatient<br>Visits | Physician<br>Visits | Drugs | Laboratory | Equipment | Non-<br>medical | Other<br>Costs | Two main cost<br>contributors                                       |
|------|-----------------------------------|--------------------|----------------------|---------------------|-------|------------|-----------|-----------------|----------------|---------------------------------------------------------------------|
| [87] | SDN (2005)                        |                    | x                    |                     | x     | x          |           |                 |                | Outpatient clinic, drugs                                            |
| [59] | SWE (1987<br>and 2005)            | x                  | x                    |                     | x     |            |           |                 |                | Hospital, drugs                                                     |
| [71] | SWE (1992-<br>1993)               | x                  | x                    | x                   |       |            |           | x               |                | Hospital, home help<br>hours                                        |
| [72] | SWE (2005)                        | x                  | x                    | x                   |       |            |           |                 |                | Hospital, medication                                                |
| [33] | SWE (2000-<br>2004)               | x                  | x                    |                     | x     | x          | x         |                 |                | Hospital, outpatient visits                                         |
| [57] | CHE (1998-<br>1999)               | x                  | x                    | x                   |       |            |           |                 |                | Hospital, medication                                                |
| [48] | TWN (1998-<br>1999)               | x                  | x                    | x                   | x     | x          |           |                 |                | No exact information on<br>share in expenditures<br>available       |
| [34] | TWN (2000)                        | x                  | x                    |                     |       |            |           |                 |                | Outpatient visits                                                   |
| [88] | THA (2007-<br>2008)               | x                  | x                    |                     | x     | x          |           | x               | x              | Informal care,<br>hospitalizations                                  |
| [41] | CARICOM<br>(2001)                 | x                  | x                    | x                   | x     | x          |           |                 |                | Medication and<br>lab/diagnostics                                   |
| [89] | ARE (2004-<br>2005)               | x                  | x                    | x                   | x     | x          |           |                 |                | Hospital (information on<br>other cost components<br>not presented) |

| Ref. | Country<br>(year of cost<br>data) | Hospital<br>Visits | Outpatient<br>Visits                                                         | Physician<br>Visits | Drugs | Laboratory | Equipment | Non-<br>medical | Other<br>Costs | Two main cost<br>contributors                                            |
|------|-----------------------------------|--------------------|------------------------------------------------------------------------------|---------------------|-------|------------|-----------|-----------------|----------------|--------------------------------------------------------------------------|
| [58] | USA (2007)                        | x                  | x                                                                            | x                   | x     | x          | x         | x               | x              | No exact information on<br>share in expenditures<br>available            |
| [78] | USA (1998)                        | x                  | x                                                                            | x                   | x     | x          | x         |                 | x              | Inpatient, outpatient                                                    |
| [50] | USA (1998)                        | x                  | x                                                                            | x                   | x     | x          | x         | x               | x              | Physician visits, hospital                                               |
| [49] | USA (1998-<br>2000)               | x                  | x                                                                            | x                   | x     | x          | x         |                 |                | Institutional care (nursing<br>home stays, hospital),<br>outpatient care |
| [90] | USA (1996)                        |                    | No breakdown of costs provided. Only self reported healthcare cost estimate. |                     |       |            |           |                 |                | NA                                                                       |
| [74] | USA (2000,<br>2005)               | x                  | x                                                                            | x                   | x     | x          | x         |                 |                | Hospital, outpatient<br>services                                         |
| [77] | USA (2000-<br>2004)               |                    | No breakdown of costs provided. Only self reported healthcare cost estimate. |                     |       |            |           |                 |                | NA                                                                       |
| [37] | USA (2000-<br>2001)               | x                  | x                                                                            |                     | x     | x          |           |                 |                | No exact information on<br>share in expenditures is<br>available         |
| [76] | USA (2004-<br>2005)               | x                  | x                                                                            | x                   |       |            |           |                 |                | Hospital, medication                                                     |
| [38] | USA (1996)                        | x                  | x                                                                            | x                   |       | x          |           |                 |                | No exact information on<br>share in expenditures<br>available            |

| Ref. | Country<br>(year of cost<br>data) | Hospital<br>Visits                                                                 | Outpatient<br>Visits | Physician<br>Visits            | Drugs | Laboratory | Equipment | Non-<br>medical | Other<br>Costs | Two main cost<br>contributors                                 |
|------|-----------------------------------|------------------------------------------------------------------------------------|----------------------|--------------------------------|-------|------------|-----------|-----------------|----------------|---------------------------------------------------------------|
| [75] | USA (2006)                        |                                                                                    |                      | No breakdown of costs provided |       |            |           |                 |                | NA                                                            |
| [60] | USA (1998-<br>2003)               | x                                                                                  | x                    | x                              | x     | x          | x         |                 |                | No exact information on<br>share in expenditures<br>available |
| [40] | USA (1998)                        | x                                                                                  | x                    |                                |       |            |           |                 |                | Hospital                                                      |
| [73] | USA (1997-<br>1998)               | No breakdown of costs provided. Only self reported total healthcare cost estimate. |                      |                                |       |            |           |                 |                | NA                                                            |
| [35] | USA (2000)                        | x                                                                                  | x                    | x                              | x     | x          | x         |                 |                | No exact information on<br>share in expenditures<br>available |
| [55] | USA (2006)                        | x                                                                                  | x                    | x                              |       |            |           |                 |                | Hospital, medication                                          |
| [51] | USA (2006-<br>2007)               | x                                                                                  | x                    | x                              |       |            |           |                 |                | Hospital, medication                                          |
| [36] | USA (2004-<br>2007)               |                                                                                    |                      | No breakdown of costs provided |       |            |           |                 |                | NA                                                            |
| [39] | USA (2000)                        |                                                                                    | x                    | x                              |       |            |           | x               | x              | Medication, ambulatory                                        |
